# Supplementary material for: In situ transformation of Fe-doped Ni12P5 into low-crystallized NiFe2O4 with high-spin Fe4+ for efficient electrocatalytic water oxidation
Source: Royal Society of Chemistry journal article supplement (doi:10.1039/d1ta01310f), 2021-01-01
Supplement: d1ta01310f1.pdf [file d1ta01310f1.pdf]

## Electronic Supplementary Information

### **In-situ transformation of Fe-doped Ni<sub>12</sub>P<sub>5</sub> into low-crystallized NiFe<sub>2</sub>O<sub>4</sub> with high-spin Fe<sup>4+</sup> for efficiently electrocatalytic water oxidation**

*Haojie Wang,<sup>a</sup> Cuijiao Zhao,<sup>a</sup> Guozhong Wang,<sup>a</sup> and Haimin Zhang<sup>a†</sup>*

---

<sup>a</sup>Key Laboratory of Materials Physics, Centre for Environmental and Energy Nanomaterials, Anhui Key Laboratory of Nanomaterials and Nanotechnology, CAS Center for Excellence in Nanoscience, Institute of Solid State Physics, HFIPS, Chinese Academy of Sciences, Hefei 230031, China.

<sup>†</sup>Corresponding author. E-mail: zhanghm@issp.ac.cn

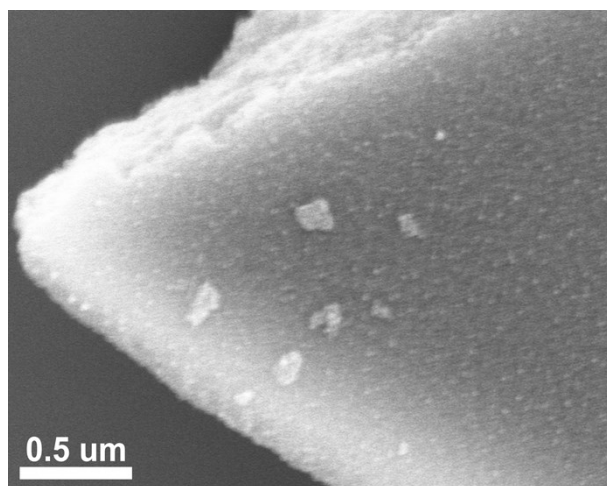

**Fig. S1** SEM image of as-fabricated  $(\text{Fe}_{0.25}\text{Ni}_{0.75})_{12}\text{P}_5@PPC$ .

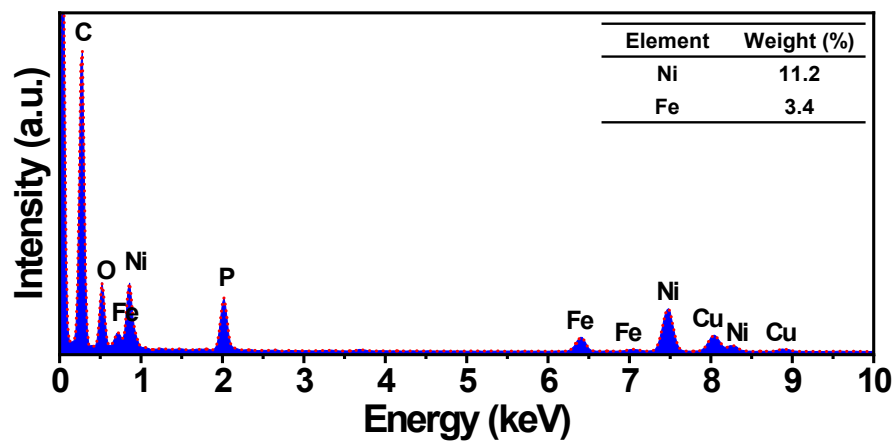

Fig. S2 EDX spectrum of as-fabricated  $(\text{Fe}_{0.25}\text{Ni}_{0.75})_{12}\text{P}_5@PPC$ .

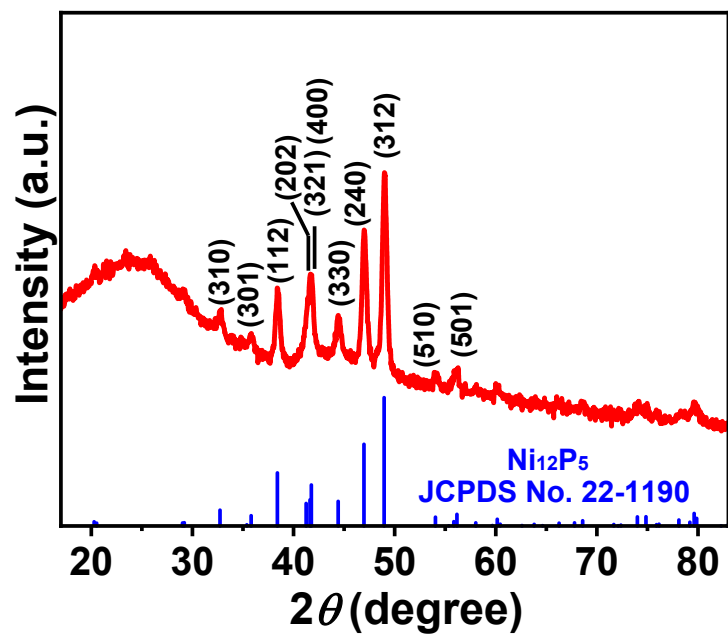

Fig. S3 XRD patterns of as-fabricated  $(\text{Fe}_{0.25}\text{Ni}_{0.75})_{12}\text{P}_5@PPC$ .

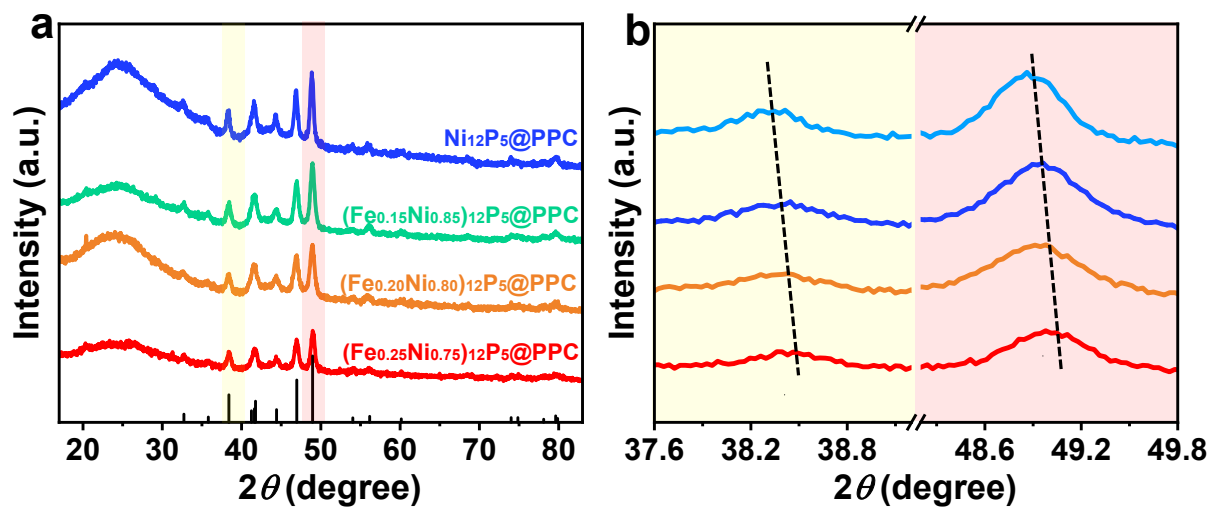

Fig. S4 (a) XRD patterns of  $(\text{Fe}_x\text{Ni}_y)_{12}\text{P}_5@PPC$  ( $x=0, 0.15, 0.20, 0.25$ ;  $y=1, 0.85, 0.80, 0.75$ ) and (b) Corresponding partial enlarged XRD patterns.

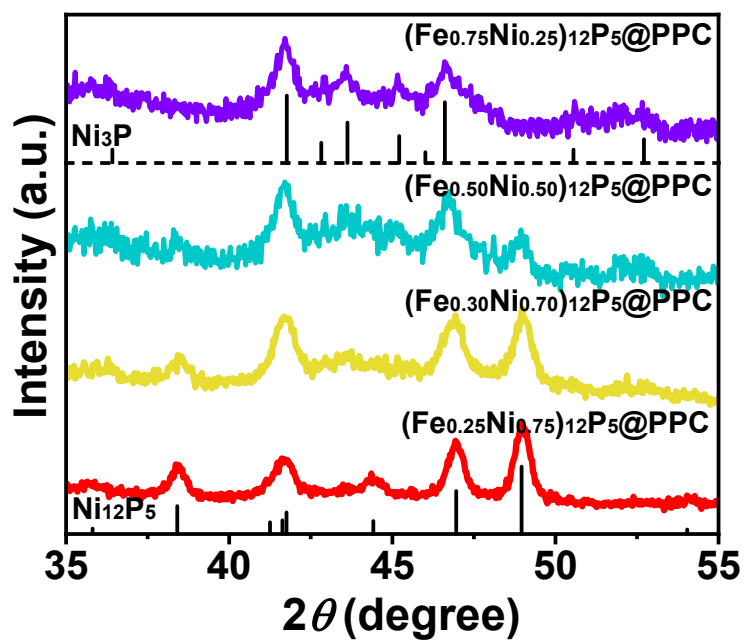

**Fig. S5** XRD patterns of the fabricated samples with Fe amount over 0.25 in  $(\text{Fe}_x\text{Ni}_y)_{12}\text{P}_5@PPC$ .

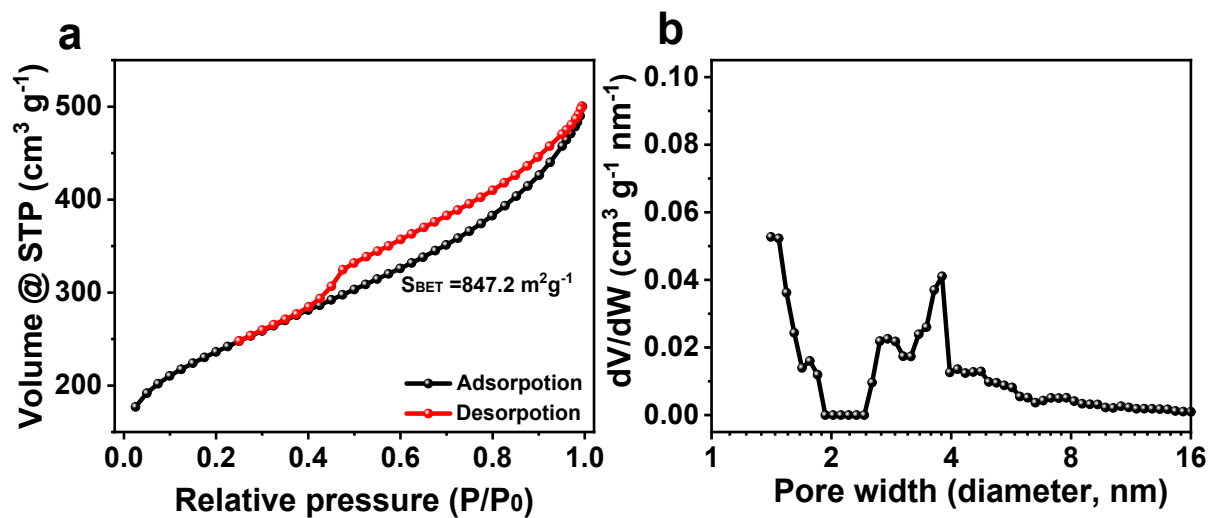

**Fig. S6** (a) N<sub>2</sub> adsorption-desorption isotherm and (b) Corresponding DFT pore size distribution curve of (Fe<sub>0.25</sub>Ni<sub>0.75</sub>)<sub>12</sub>P<sub>5</sub>@PPC.

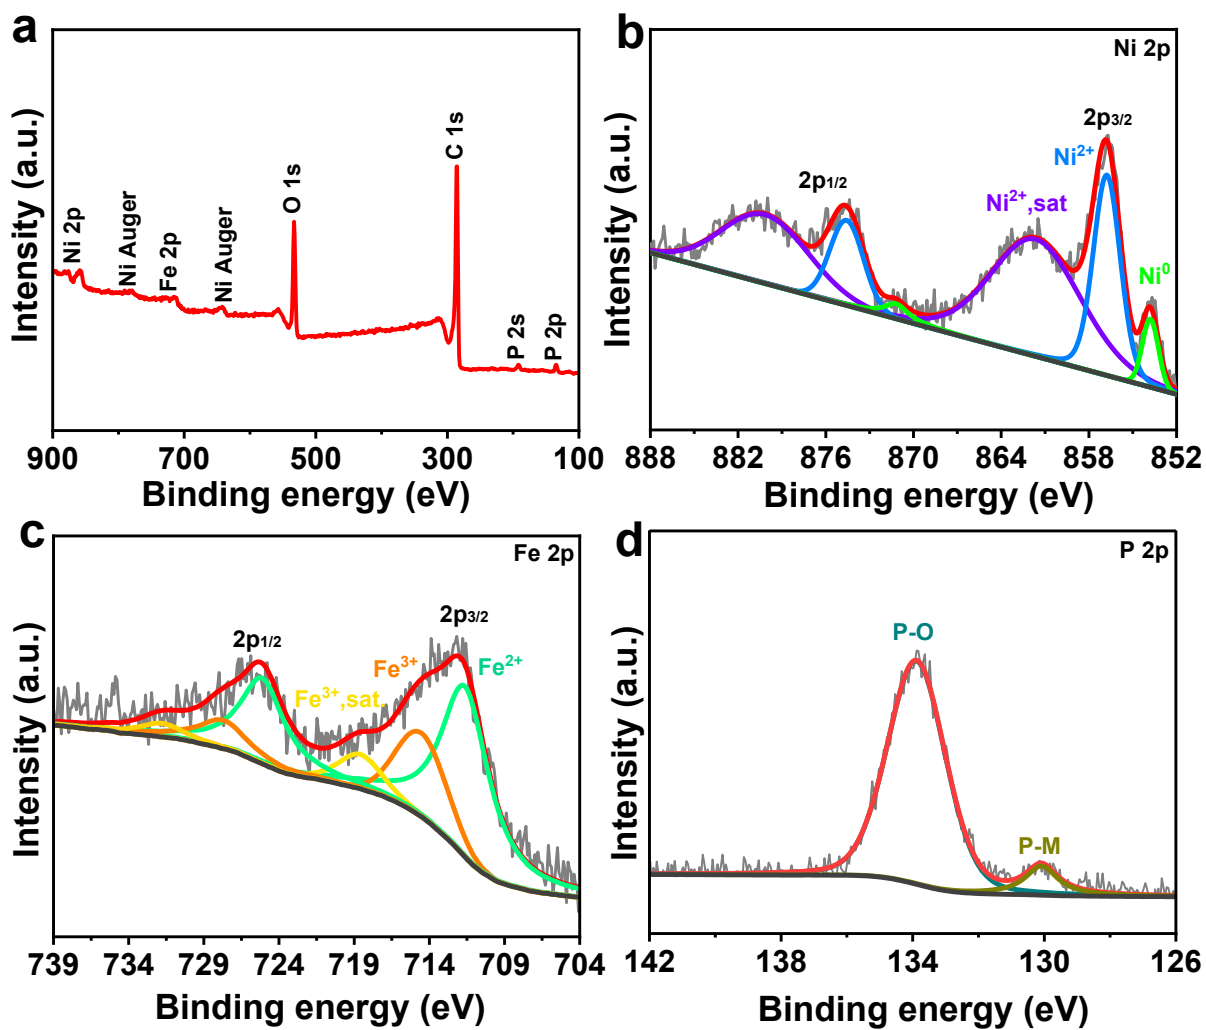

**Fig. S7** (a) XPS survey spectrum and corresponding high-resolution (b) Ni 2p, (c) Fe 2p, and (d) P 2p XPS spectra of  $(\text{Fe}_{0.25}\text{Ni}_{0.75})_{12}\text{P}_5@PPC$ .



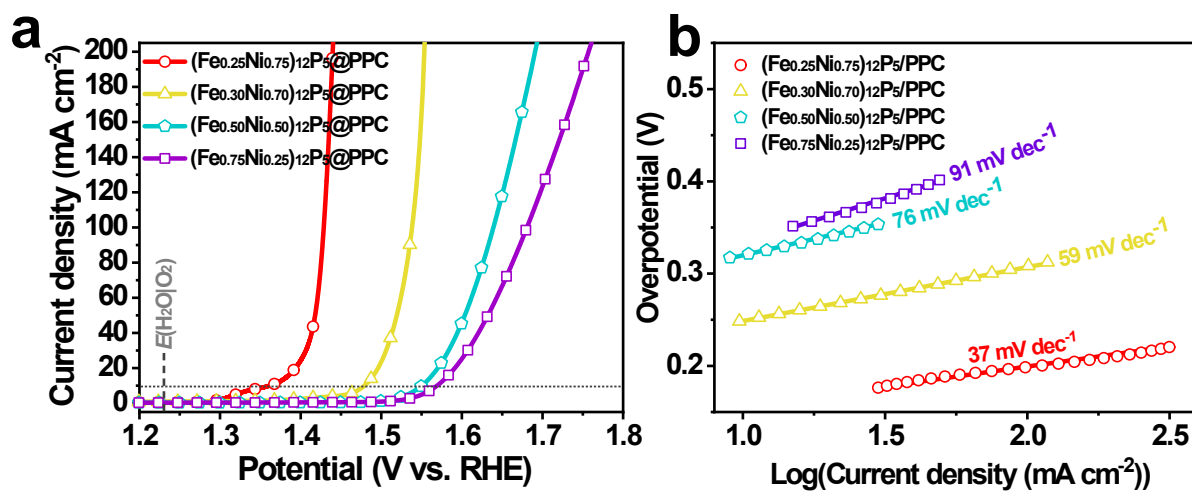

**Fig. S8** (a) OER polarization curves of the samples with Fe amount over 0.25 in  $(\text{Fe}_x\text{Ni}_y)_{12}\text{P}_5@\text{PPC}$  measured in 1.0 M KOH solution (pH=14) with a scan rate of  $5.0 \text{ mV s}^{-1}$  with 95% iR-correction. (b) Tafel plots derived from corresponding OER polarization curves.

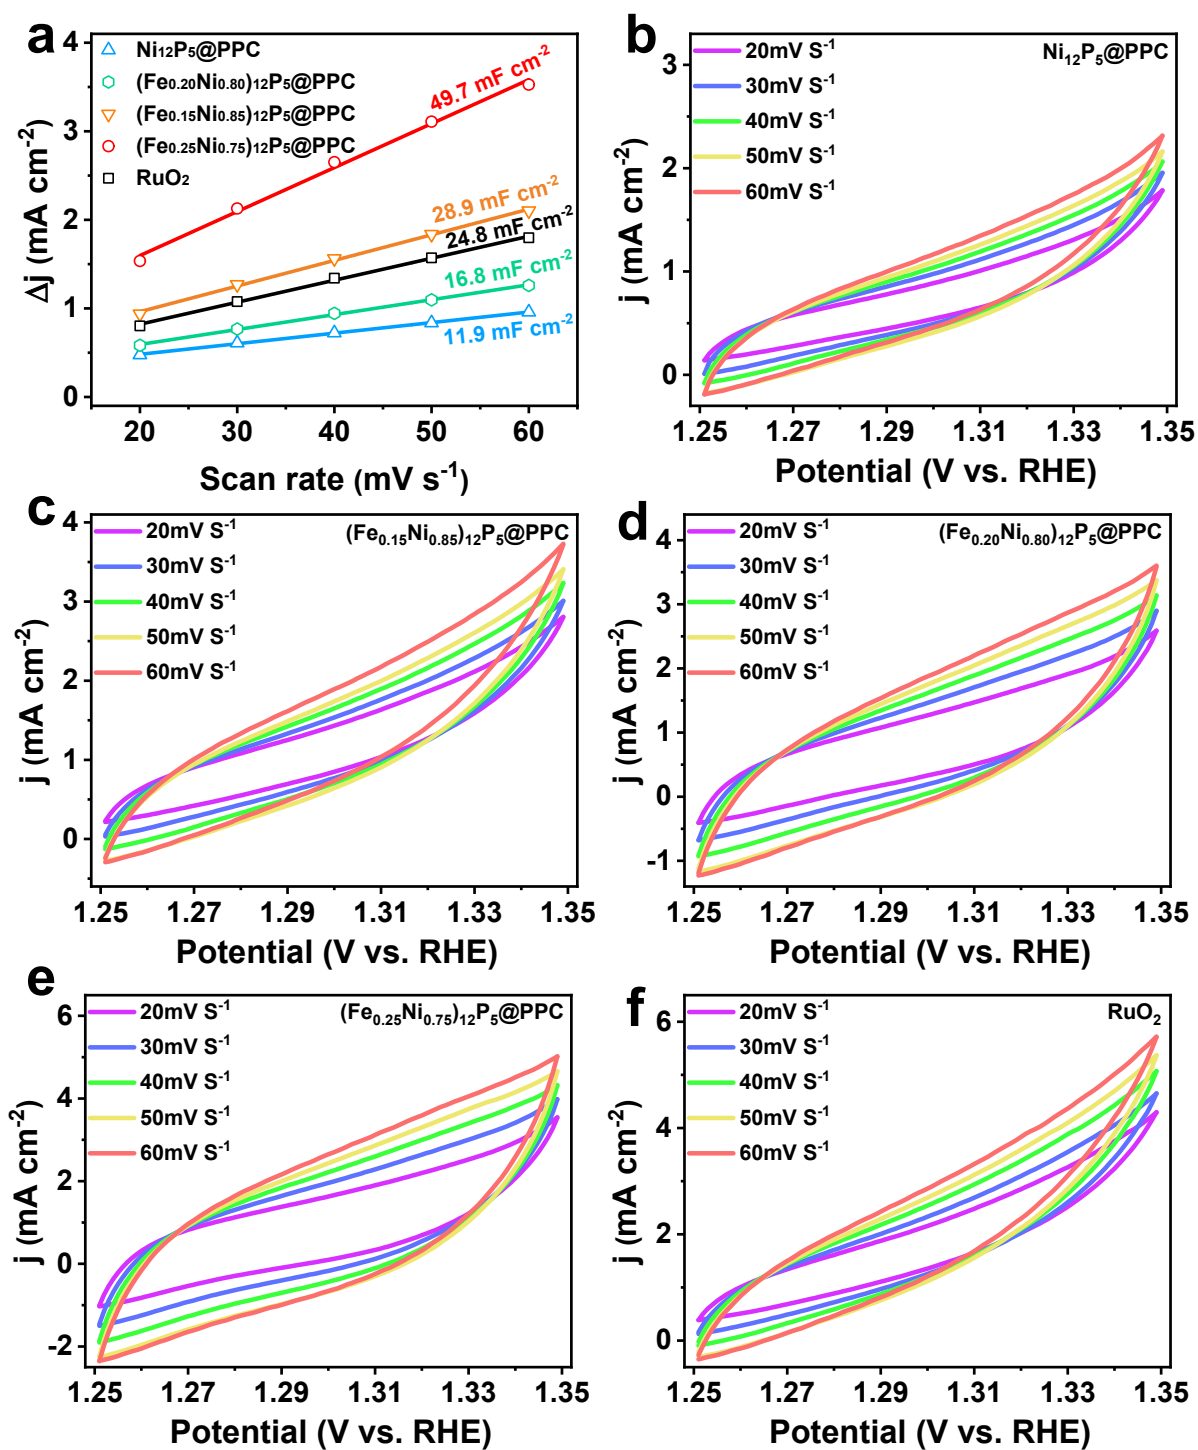

**Fig. S9** (a) Scan rate dependence of current density for the catalysts at 1.30 V vs. RHE. CV curves at different scan rates for (b)  $\text{Ni}_{12}\text{P}_5@PPC$ , (c)  $(\text{Fe}_{0.15}\text{Ni}_{0.85})_{12}\text{P}_5@PPC$ , (d)  $(\text{Fe}_{0.20}\text{Ni}_{0.80})_{12}\text{P}_5@PPC$ , (e)  $(\text{Fe}_{0.25}\text{Ni}_{0.75})_{12}\text{P}_5@PPC$ , and (f)  $\text{RuO}_2$ .

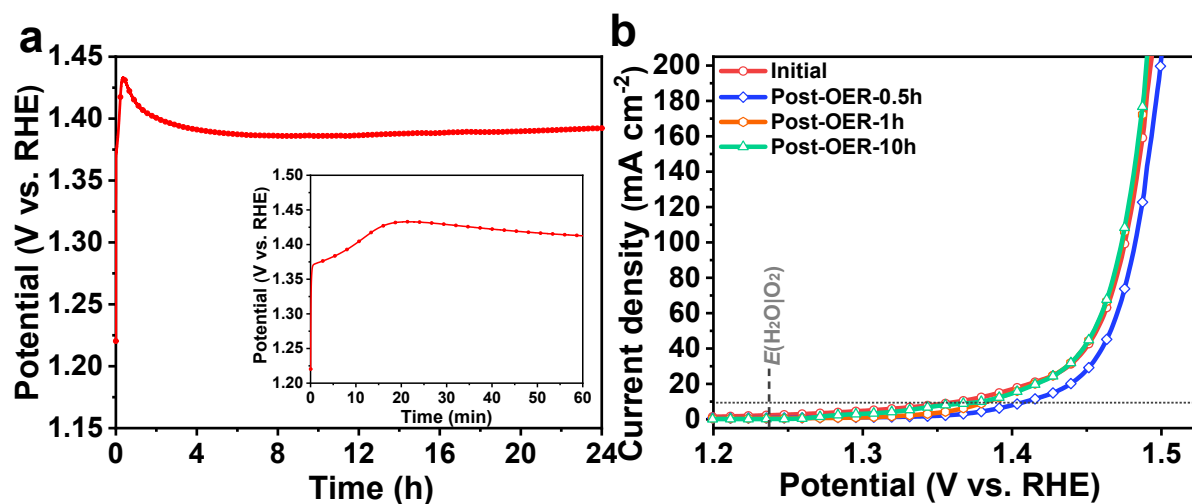

**Fig. S10** (a) Chronopotentiometry curve of  $(\text{Ni}_{0.75}\text{Fe}_{0.25})_{12}\text{P}_5@\text{PPC}$  at a constant current density of  $10 \text{ mA cm}^{-2}$  for a total duration of 24 h (inset of corresponding partial enlarged view), (b) LSV curves (with a scan rate of  $5.0 \text{ mV s}^{-1}$  and 95% iR-correction) before and after 0.5 h, 1 h and 10 h OER tests.)

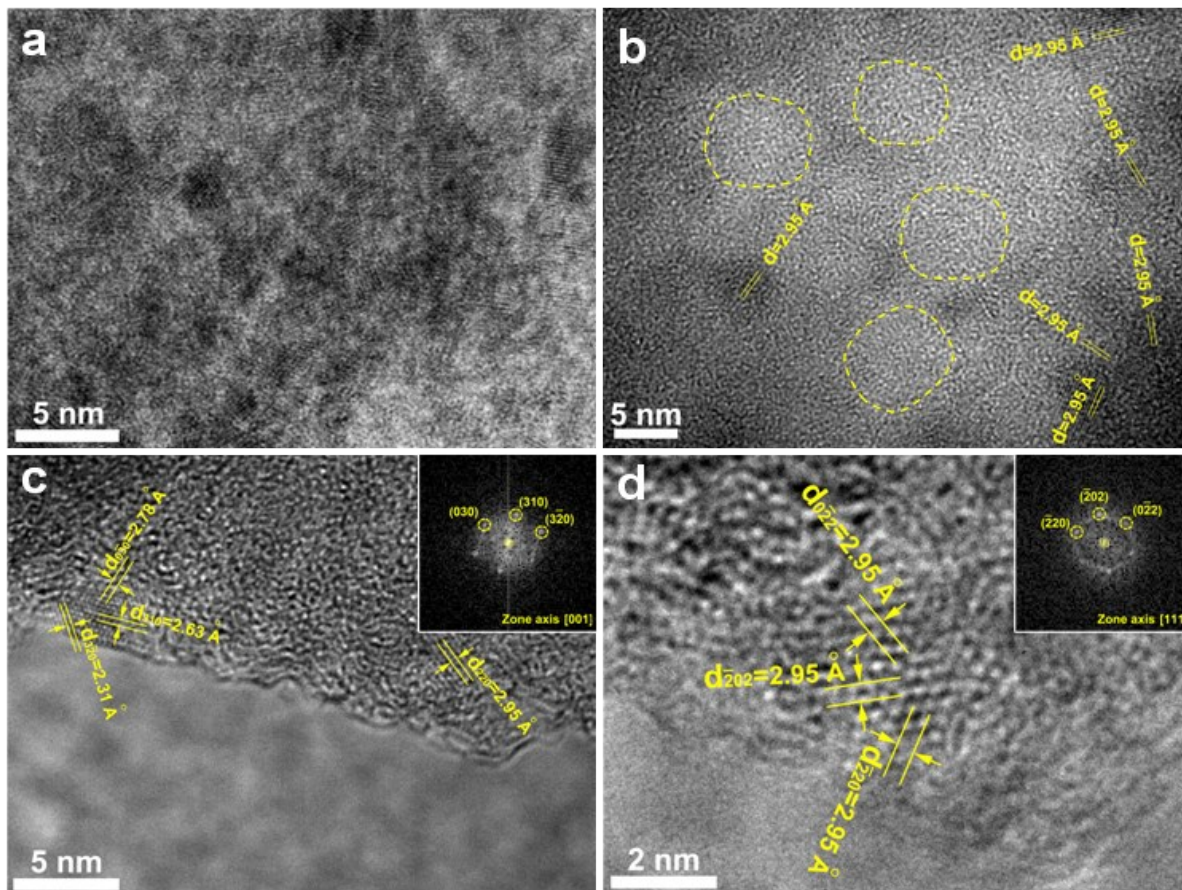

**Fig. S11** (a), (b), (c) and (d) HRTEM images of Post-OER-10h sample. (insets of c, d: corresponding FFT patterns along [001] and [111] zone axes).

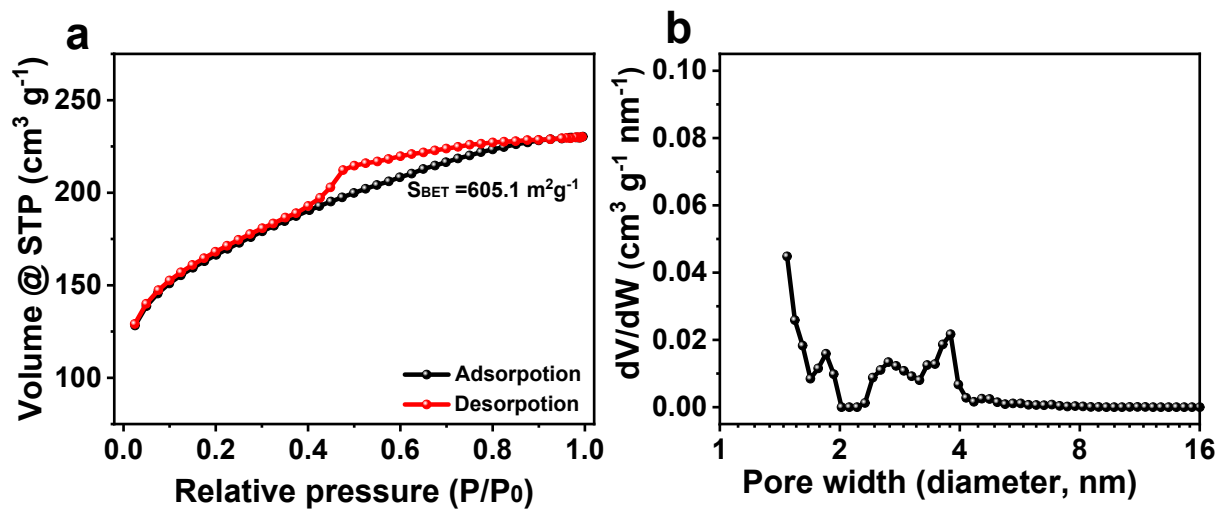

**Fig. S12** (a) N<sub>2</sub> adsorption-desorption isotherm and (b) Corresponding DFT pore size distribution curve of Post-OER-10h sample.

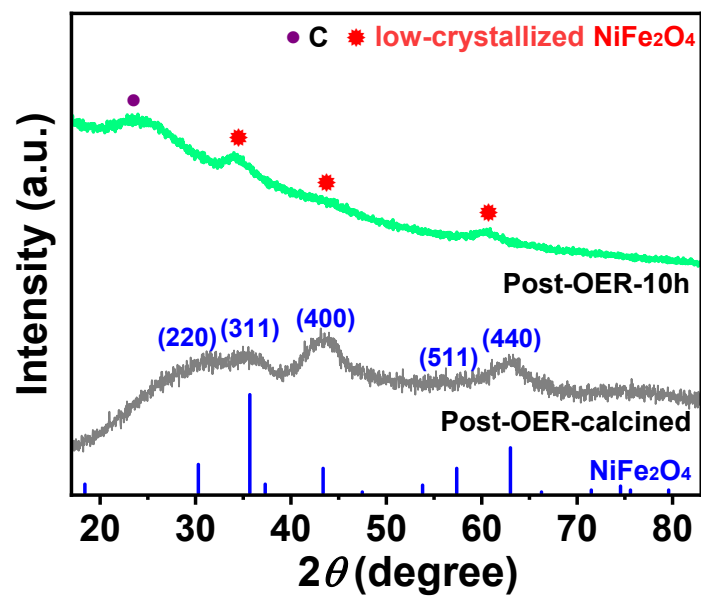

**Fig. S13** XRD patterns of Post-OER-10h sample and corresponding calcined (Post-OER-calcined) sample (annealed at  $350^\circ\text{C}$  under  $\text{N}_2$  atmosphere for 1 h).

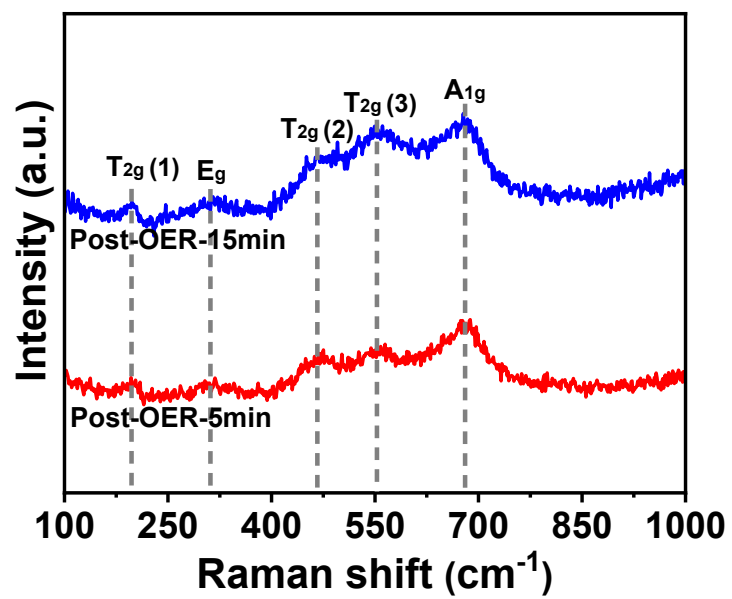

**Fig. S14** Raman spectra of Post-OER-5min and Post-OER-15min samples.

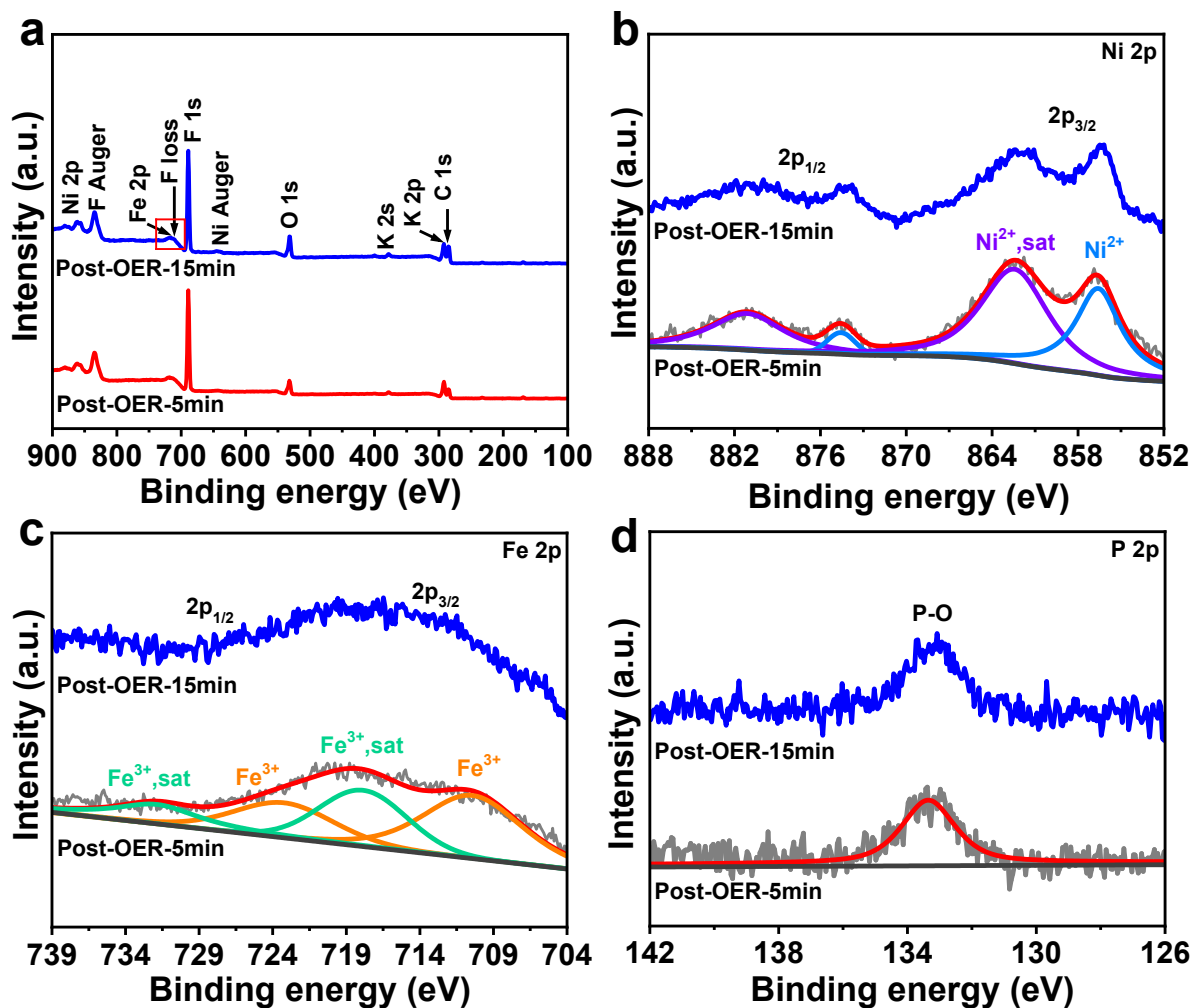

Fig. S15 (a) XPS survey spectrum and (b) Corresponding high-resolution Ni 2p, (c) Fe 2p, and (d) P 2p XPS spectra of Post-OER-5min and Post-OER-15min samples.



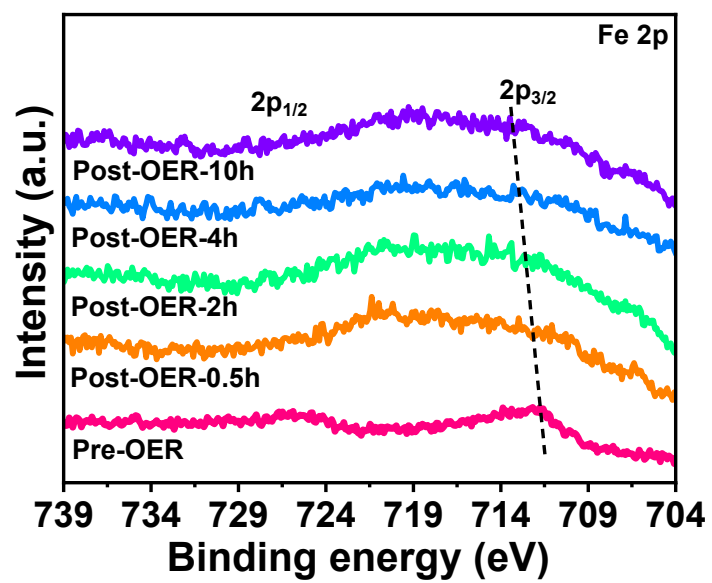

**Fig. S16** Fe 2p XPS spectra of Pre-OER and Post-OER- $t$  samples.

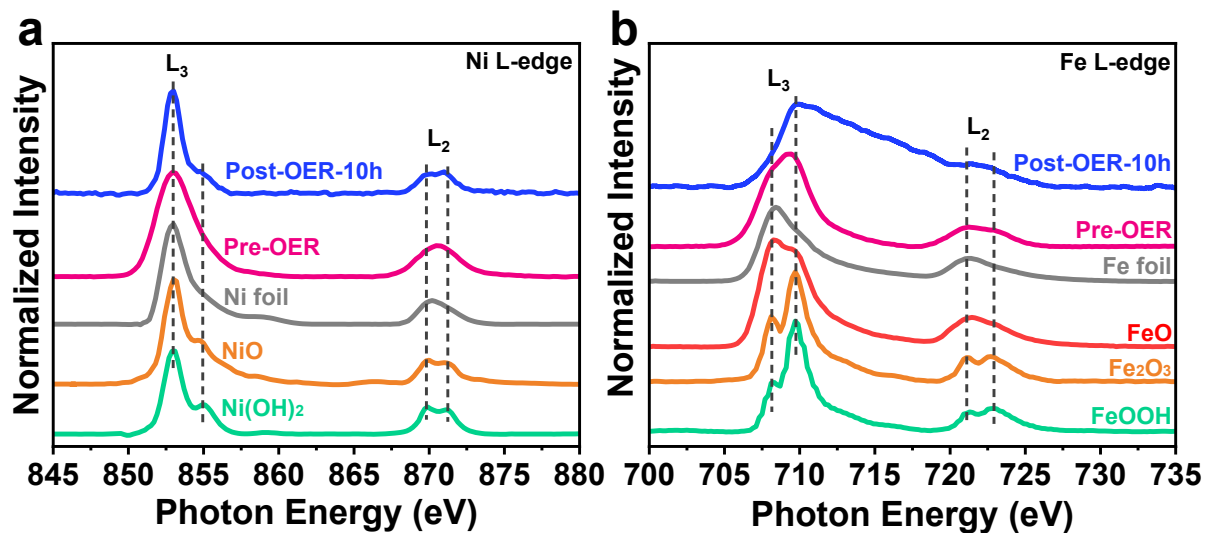

Fig. S17 (a) Ni L-edge and (b) Fe L-edge NEXAFS of Pre-OER and Post-OER-10h samples.

**Table S1.** Comparison of the OER performances (measured in 1.0 M KOH) for different electrocatalysts.

| Catalysts                                                                  | $\eta_{10}$ (mV) | Tafel slope(mV/dec) | Reference                                                               |
|----------------------------------------------------------------------------|------------------|---------------------|-------------------------------------------------------------------------|
| NiFe-LDH/CNT                                                               | 220              | 31                  | <i>J Am Chem Soc</i> , <b>2013</b> , 135, 8452.                         |
| CF@NiP <sub>x</sub>                                                        | 200              | 54.7                | <i>J. Mater. Chem. A</i> , <b>2016</b> , 4, 9691.                       |
| NiFeS/NF                                                                   | 189              | 65                  | <i>J. Mater. Chem. A</i> , <b>2016</b> , 4, 13499.                      |
| Ni <sub>3</sub> FeN-NPs                                                    | 280              | 46                  | <i>Advanced Energy Materials</i> , <b>2016</b> , 6, 1502585.            |
| Fe-Ni-P/RGO                                                                | 240              | 63                  | <i>ACS Applied Materials &amp; Interfaces</i> , <b>2017</b> , 9, 23852. |
| Ni <sub>2</sub> P(O)/Fe <sub>2</sub> P(O)                                  | 179              | 42.7                | <i>ACS Energy Letters</i> , <b>2017</b> , 2, 2257.                      |
| (Fe <sub>0.5</sub> Ni <sub>0.5</sub> ) <sub>2</sub> P/NF                   | 156              | 66                  | <i>Nano Energy</i> , <b>2017</b> , 38, 553.                             |
| bulk amorphous NiFeP                                                       | 219              | 32                  | <i>Advanced Materials</i> , <b>2017</b> , 29, 1606570.                  |
| (Ni <sub>0.5</sub> Fe <sub>0.5</sub> ) <sub>2</sub> P                      | 203              | 57                  | <i>J. Mater. Chem. A</i> , <b>2017</b> , 5, 11229.                      |
| Co <sub>4</sub> Ni <sub>1</sub> P                                          | 245              | 61                  | <i>Advanced Functional Materials</i> , <b>2017</b> , 27, 1703455.       |
| a-NiFe-OH/NiFeP/NF                                                         | 199              | 39                  | <i>ACS Energy Letters</i> , <b>2017</b> , 2, 1035.                      |
| CoNi(20:1)-P-NS                                                            | 209              | 52                  | <i>Energy &amp; Environmental Science</i> , <b>2017</b> , 10, 893.      |
| Fe-Co-P                                                                    | 252              | 33                  | <i>ACS Nano</i> , <b>2018</b> , 12, 158.                                |
| Ni <sub>2</sub> Fe <sub>1</sub> -O                                         | 244              | 39                  | <i>Advanced Energy Materials</i> , <b>2018</b> , 8, 1701347.            |
| IrO <sub>2</sub> @Ir                                                       | 255              | 45                  | <i>Nanoscale</i> , <b>2019</b> , 11, 4407.                              |
| H-NiFe-LDH                                                                 | 184              | 62.3                | <i>Energy &amp; Environmental Science</i> , <b>2019</b> , 12, 572.      |
| Cr-FeNi-P/NCN                                                              | 240              | 72.4                | <i>Advanced Materials</i> , <b>2019</b> , 31, 1900178.                  |
| a-LNF(t-d)                                                                 | 189              | 36                  | <i>Advanced Materials</i> , <b>2019</b> , 31, 1900883.                  |
| FeP <sub>2</sub> -NiP <sub>2</sub> @PC                                     | 248              | 54                  | <i>ACS Appl Mater Interfaces</i> , <b>2019</b> , 12, 727.               |
| NiFe-NFF                                                                   | 227              | 38.9                | <i>Advanced Functional Materials</i> , <b>2019</b> , 29, 1807418.       |
| FeNiP/C-900                                                                | 229              | 74.5                | <i>Nano Energy</i> , <b>2019</b> , 62, 745.                             |
| FeNi <sub>3</sub> @NC                                                      | 277              | 77                  | <i>Applied Catalysis B: Environmental</i> , <b>2020</b> , 268, 118729.  |
| FeOOH/Ni <sub>3</sub> N                                                    | 244              | 65                  | <i>Applied Catalysis B: Environmental</i> , <b>2020</b> , 269, 118600.  |
| (Ni <sub>x</sub> Fe <sub>1-x</sub> ) <sub>2</sub> P                        | 166              | 59.3                | <i>ACS Catalysis</i> , <b>2020</b> , 10, 9086.                          |
| (Fe <sub>0.25</sub> Ni <sub>0.75</sub> ) <sub>12</sub> P <sub>5</sub> @PPC | 131              | 37                  | This work                                                               |

**Table S2.** The results of ICP-AES and corresponding amount of metal atoms.

| Samples                                                                    | ICPdetermined Element content(%) |     |                    | Element content of metal working electrode ( $\mu\text{mol}$ ) |     |                    |
|----------------------------------------------------------------------------|----------------------------------|-----|--------------------|----------------------------------------------------------------|-----|--------------------|
|                                                                            | Ni                               | Fe  | Total <sup>a</sup> | Ni                                                             | Fe  | Total <sup>a</sup> |
| (Fe <sub>0.25</sub> Ni <sub>0.75</sub> ) <sub>12</sub> P <sub>5</sub> @PPC | 15.7                             | 4.9 | 20.6               | 5.4                                                            | 1.8 | 7.2                |
| (Fe <sub>0.20</sub> Ni <sub>0.80</sub> ) <sub>12</sub> P <sub>5</sub> @PPC | 16.4                             | 3.9 | 20.3               | 5.7                                                            | 1.4 | 7.1                |
| (Fe <sub>0.15</sub> Ni <sub>0.85</sub> ) <sub>12</sub> P <sub>5</sub> @PPC | 17.4                             | 3.3 | 20.7               | 6.0                                                            | 1.1 | 7.1                |
| Ni <sub>12</sub> P <sub>5</sub> @PPC                                       | 20.5                             | 0   | 20.5               | 7.0                                                            | 0   | 7.0                |
| IrO <sub>2</sub>                                                           | -                                | -   | 76.0               | -                                                              | -   | 15.0               |

<sup>a</sup> Total metal content in the samples.

**Table S3.** Comparison of OER activity of different catalysts.

| Catalysts                                                                  | $\eta_{10}$<br>(mV) | $\eta_{100}$<br>(mV) | Tafel slope<br>(mV/dec) | $C_{DL}$<br>(mF cm <sup>-2</sup> ) | ESCA<br>(cm <sup>2</sup> ) | j at $\eta = 0.25V$<br>(mA cm <sup>-2</sup> ) | TOF at $\eta = 0.25V$<br>(s <sup>-1</sup> ) |
|----------------------------------------------------------------------------|---------------------|----------------------|-------------------------|------------------------------------|----------------------------|-----------------------------------------------|---------------------------------------------|
| Ni <sub>12</sub> P <sub>5</sub> @PPC                                       | 302                 | 400                  | 96                      | 6.0                                | 145.0                      | 7.1                                           | 0.003                                       |
| (Fe <sub>0.15</sub> Ni <sub>0.75</sub> ) <sub>12</sub> P <sub>5</sub> @PPC | 269                 | 363                  | 93                      | 8.4                                | 210.0                      | 6.5                                           | 0.002                                       |
| (Fe <sub>0.20</sub> Ni <sub>0.80</sub> ) <sub>12</sub> P <sub>5</sub> @PPC | 237                 | 330                  | 83                      | 14.5                               | 362.5                      | 14.6                                          | 0.005                                       |
| (Fe <sub>0.25</sub> Ni <sub>0.75</sub> ) <sub>12</sub> P <sub>5</sub> @PPC | 131                 | 198                  | 37                      | 24.9                               | 622.5                      | 422.0                                         | 0.156                                       |
| RuO <sub>2</sub>                                                           | 227                 | 322                  | 113                     | 12.4                               | 310.0                      | 19.4                                          | 0.003                                       |

The ECSA values of the catalysts were calculated according to the following equation:

$$ECSA = C_{dl}/C_s$$

where  $C_{dl}$  is double layer capacitance determined by CV curves at the non-Faradaic region (1.25-1.35 V vs. RHE) with different scan rates (20 to 60 mV s<sup>-1</sup>), and  $C_s$  is the specific capacitance value of an ideal flat surface with a real surface area of 1.0 cm<sup>2</sup>. In this work,  $C_{dl}$  was estimated as half of the linear slope of charging current density differences ( $\Delta J$ ) against the scan rates plots (Fig. S9a), and  $C_s$  was taken the general value of 0.04 mF (the calculation refers to *J. Am. Chem. Soc.* **2013**, *135*, 16977).

The turnover frequency (TOF) was calculated according to the following equation:

$$TOF = (j \times A)/(4 \times n \times F)$$

where j is the current density obtained at 1.48 V (vs. RHE), A is the surface area of the working electrode (1.0 cm<sup>2</sup>), F is the Faraday efficiency (96485 C mol<sup>-1</sup>) and n is the number of moles of metal (by assuming every metal atom to be catalytically active) loaded on the working electrodes (listed in Table S2) (the calculation refers to *Chem. Sci.*, **2011**, *2*, 1262).

**Table S4.** Spectroscopy parameters of samples at room temperature.

| Samples       | Component              | Isomer shift<br>( $\delta$ , mm s <sup>-1</sup> ) | Quadrupole splitting<br>( $\Delta$ , mm s <sup>-1</sup> ) | H <sub>hf</sub><br>(T) | Assignment                       | Area<br>(%) |
|---------------|------------------------|---------------------------------------------------|-----------------------------------------------------------|------------------------|----------------------------------|-------------|
| Pre-OER       | Para, Fe <sup>2+</sup> | 1.37                                              | 2.74                                                      | -                      | -                                | 14.3        |
|               | Para, Fe <sup>3+</sup> | 0.35                                              | 0.88                                                      | -                      | -                                | 85.7        |
| Post-OER-0.5h | Para, Fe <sup>3+</sup> | 0.42                                              | 0.58                                                      | -                      | -                                | 50.1        |
|               | Para, Fe <sup>4+</sup> | -0.09                                             | -                                                         | -                      | -                                | 4.9         |
|               | Mag, Fe <sup>3+</sup>  | 0.31                                              | 0.04                                                      | 48.5                   | NiFe <sub>2</sub> O <sub>4</sub> | 22.5        |
|               | Mag, Fe <sup>3+</sup>  | 0.72                                              | 0.17                                                      | 52.1                   |                                  | 22.5        |
| Post-OER-2h   | Para, Fe <sup>3+</sup> | 0.38                                              | 0.65                                                      | -                      | -                                | 71.8        |
|               | Para, Fe <sup>4+</sup> | -0.10                                             | -                                                         | -                      | -                                | 11.3        |
|               | Mag, Fe <sup>3+</sup>  | 0.28                                              | 0.04                                                      | 48.9                   | NiFe <sub>2</sub> O <sub>4</sub> | 16.9        |
| Post-OER-4h   | Para, Fe <sup>3+</sup> | 0.35                                              | 0.51                                                      | -                      | -                                | 86.2        |
|               | Para, Fe <sup>4+</sup> | -0.10                                             | -                                                         | -                      | -                                | 13.8        |
| Post-OER-10h  | Para, Fe <sup>3+</sup> | 0.38                                              | 0.62                                                      | -                      | -                                | 85.8        |
|               | Para, Fe <sup>4+</sup> | -0.10                                             | -                                                         | -                      | -                                | 14.2        |
